# Supplementary material for: Functionally Significant, Rare Transcription Factor Variants in Tetralogy of Fallot
Source: PLoS One. 2014 Aug 5;9(8):e95453. doi: 10.1371/journal.pone.0095453 (PMC4122343; doi:10.1371/journal.pone.0095453)
Supplement: Table S3 — Variants found with a frequency of >1% in the control population. (XLSX) [file pone.0095453.s003.xlsx]

## Sheet: S3
gene	location	base	aa change	Found in 500 controls
FOXA2	exon 3	c.*389_390insC	n/a (3'UTR)	50
		c.*508dupA	n/a (3'UTR)	50
ISL1	5'UTR	c.-240G>A	n/a	13
	intron 1-2	c.28+17C>T	n/a	34
	exon 4	c.567C>T	p.D189D	>100
BOP	3'UTR	c.*2400C>T	n/a	19
